# Supplementary material for: Solvent effect on xylose-to-furfural reaction in biphasic systems: combined experiments with theoretical calculations
Source: Royal Society of Chemistry journal article supplement (doi:10.1039/d1gc02812j), 2021-01-01
Supplement: d1gc02812j1.pdf [file d1gc02812j1.pdf]

1  
2  
3  
4  
5  
6  
7  
8  
9  
10  
11  
12  
13  
14  
15  
16  
17  
18  
19  
20  
21  
22

## Supplementary Information

### Solvent Effect on Xylose-to-Furfural Reaction in Biphasic Systems: Combined Experiments with Theoretical Calculations

Qixuan Lin,<sup>a</sup> Qiwen Zhan<sup>a</sup>, Rui Li<sup>a</sup>, Shouwei Liao,<sup>b</sup> Junli Ren,<sup>a,\*</sup> Feng Peng,<sup>c</sup> Libo  
Li<sup>b,\*</sup>

<sup>a</sup>State Key Laboratory of Pulp and Paper Engineering, South China University of  
Technology, Wushan Road, Tianhe District, Guangzhou 510640, China.

<sup>b</sup>School of Chemistry and Chemical Engineering, South China University of  
Technology, Wushan Road, Tianhe District, Guangzhou 510640, China

<sup>c</sup>Beijing Key Laboratory of Lignocellulosic Chemistry, Beijing Forestry University,  
East Qinghua Road, Haidian District, Beijing, 100083, China

\***Email:** renjunli@scut.edu.cn; celbli@scut.edu.cn;

### 23 **Molecular Dynamics Simulation**

24 Molecular dynamics (MD) simulation was performed using GROMACS 5.1.4  
25 package.<sup>1-3</sup> OPLS topology data for molecules were obtained from LigParGen, a free  
26 web service offered by Jorgensen research group.<sup>4-6</sup> In the simulations, xylose and  
27 furfural molecules (solute), were solvated in six biphasic systems, respectively (the  
28 water and organic solvent volume ratio is 1:1). The simulation box sizes were ~3.0 nm  
29 with PBC (periodic boundary condition) applied to all 3 dimensions of the system. The  
30 OPLS/AA force-field<sup>6, 7</sup> was employed to model the xylose, furfural and organic  
31 solvent molecules, while TIP4P<sup>8</sup> model was used to describe the water molecule. Each  
32 system was simulated for 25 ns in an NVT ensemble with an integration time step of 2  
33 fs and the last 20 ns was used for the subsequent analysis. This was preceded by a 5 ns  
34 of NPT equilibration MD run. Steepest-descent energy minimization was performed  
35 before the NPT MD simulation to remove accidental overlaps. All the simulation  
36 systems were maintained at 298 K using the v-rescale thermostat.<sup>9</sup> A time constant of  
37 0.1 ps was applied for the temperature coupling. The Lennard-Jones (LJ) interactions  
38 were switched off smoothly between 10 and 12 Å, and a long-range analytical  
39 dispersion correction<sup>10</sup> was applied to the energy and pressure to account for the  
40 truncation of LJ interactions. The neighbour list was updated every 0.01 ps within 1.2  
41 nm. The electrostatic interactions were evaluated with a real-space cutoff of 12 Å, with  
42 the long-range component calculated with the PME (Particle Mesh Ewald) method.<sup>11</sup>  
43 LINCS<sup>12</sup> algorithm was used to constraint the bonds involving hydrogen atoms, and  
44 SETTLE<sup>13</sup> algorithm was employed to constraint water geometry. The simulation

45 trajectory data (saved every 2ps) were analyzed with the GROMACS package, with  
46 figures produced by the VMD<sup>14</sup> software. The Z-axis coordinates of xylose and furfural  
47 over time, radial distribution functions (RDF), spatial density functions (SDF), and  
48 hydrogen bonds (H-bonds) between solute and solvents were calculated. As for other  
49 simulation details, please refer to our previous publications.<sup>15, 16</sup>

50

51

52

53

54

55

56

57

58

59

60

61

62

63

64

65

66

67 **Table S1.** The partition coefficient of furfural in the biphasic systems during reaction

| Systems                    | Time (min) | Partition coefficient |       |       |
|----------------------------|------------|-----------------------|-------|-------|
|                            |            | 170°C                 | 180°C | 190°C |
| 2-Butanol/H <sub>2</sub> O | 40         | 362                   | 65    | 6     |
|                            | 60         | 66                    | 9     | 5     |
|                            | 80         | 12                    | 8     | 30    |
|                            | 100        | 12                    | 7     | 4     |
| 2-MTHF/H <sub>2</sub> O    | 40         | 242                   | 68    | 10    |
|                            | 60         | 114                   | 4     | 9     |
|                            | 80         | 15                    | 22    | 9     |
|                            | 100        | 18                    | 14    | 8     |
| CPME/H <sub>2</sub> O      | 40         | 208                   | 33    | 3     |
|                            | 60         | 20                    | 5     | 2     |
|                            | 80         | 5                     | 5     | 4     |
|                            | 100        | 6                     | 4     | 3     |
| Toluene/H <sub>2</sub> O   | 40         | 21                    | 10    | 2     |
|                            | 60         | 9                     | 3     | 2     |
|                            | 80         | 6                     | 5     | 3     |
|                            | 100        | 4                     | 4     | 3     |
| MIBK/H <sub>2</sub> O      | 40         | 195                   | 42    | 25    |
|                            | 60         | 62                    | 23    | 10    |
|                            | 80         | 22                    | 20    | 15    |
|                            | 100        | 16                    | 15    | 15    |
| DCM/H <sub>2</sub> O       | 40         | 22                    | 16    | 6     |
|                            | 60         | 8                     | 32    | 15    |
|                            | 80         | 12                    | 19    | 19    |
|                            | 100        | 12                    | 16    | 266   |

68

69

70

71

72

73

74 **Table S2.** Kinetics parameters for xylose conversion in the six biphasic systems

| <b>Solvent system</b>      | <b>Temp.</b> | <b>k<sub>1</sub>(min<sup>-1</sup>)</b> | <b>k<sub>2</sub>(min<sup>-1</sup>)</b> | <b>k<sub>3</sub>(min<sup>-1</sup>)</b> | <b>k<sub>4</sub>(min<sup>-1</sup>)</b> |
|----------------------------|--------------|----------------------------------------|----------------------------------------|----------------------------------------|----------------------------------------|
| 2-Butanol/H <sub>2</sub> O | 170°C        | 0.011                                  | 27.28                                  | $1.65 \times 10^{-11}$                 | 0.025                                  |
|                            | 180°C        | 0.0086                                 | 92.17                                  | 0.015                                  | 0.0058                                 |
|                            | 190°C        | 0.0066                                 | 92.12                                  | 0.020                                  | $3.19 \times 10^{-9}$                  |
| 2-MTHF/H <sub>2</sub> O    | 170°C        | 0.016                                  | 22.34                                  | $1.32 \times 10^{-13}$                 | 0.018                                  |
|                            | 180°C        | 0.0089                                 | 44.76                                  | 0.013                                  | $8.46 \times 10^{-16}$                 |
|                            | 190°C        | 0.0064                                 | 35.34                                  | 0.016                                  | $1.88 \times 10^{-16}$                 |
| CPME/H <sub>2</sub> O      | 170°C        | 0.0050                                 | 29.80                                  | 0.0022                                 | 0.013                                  |
|                            | 180°C        | 0.0082                                 | 60.08                                  | 0.0032                                 | 0.025                                  |
|                            | 190°C        | 0.0037                                 | 40.89                                  | 0.0091                                 | $2.03 \times 10^{-16}$                 |
| Toluene/H <sub>2</sub> O   | 170°C        | 0.0041                                 | 92.12                                  | 0.0091                                 | $4.29 \times 10^{-18}$                 |
|                            | 180°C        | 0.0073                                 | 92.13                                  | 0.0034                                 | 0.040                                  |
|                            | 190°C        | 0.0032                                 | 92.10                                  | 0.0137                                 | $4.42 \times 10^{-17}$                 |
| MIBK/H <sub>2</sub> O      | 170°C        | 0.011                                  | 37.85                                  | $4.18 \times 10^{-12}$                 | 0.026                                  |
|                            | 180°C        | 0.0075                                 | 91.44                                  | 0.013                                  | $2.77 \times 10^{-14}$                 |
|                            | 190°C        | 0.0099                                 | 92.13                                  | 0.014                                  | $1.13 \times 10^{-16}$                 |
| DCM/H <sub>2</sub> O       | 170°C        | 0.021                                  | 91.44                                  | 0.0154                                 | $1.56 \times 10^{-13}$                 |
|                            | 180°C        | 0.077                                  | 92.47                                  | $2.21 \times 10^{-12}$                 | 0.017                                  |
|                            | 190°C        | 0.050                                  | 92.98                                  | 0.058                                  | 0.013                                  |

75

76

77

78

79

80

81

82 **Table S3.** The solvation free energy ( $\Delta G_{\text{sol}}$ ) of furfural in various solvents

| <b>Solvents</b> | <b><math>\Delta G_{\text{sol}}</math> in the<br/>first 1 ns<br/>(kJ/mol)</b> | <b><math>\Delta G_{\text{sol}}</math> in the<br/>first 2 ns<br/>(kJ/mol)</b> | <b><math>\Delta G_{\text{sol}}</math> in the<br/>first 3 ns<br/>(kJ/mol)</b> | <b><math>\Delta G_{\text{sol}}</math> in the<br/>first 4 ns<br/>(kJ/mol)</b> |
|-----------------|------------------------------------------------------------------------------|------------------------------------------------------------------------------|------------------------------------------------------------------------------|------------------------------------------------------------------------------|
| Water           | -17.32±0.40                                                                  | -17.22±0.26                                                                  | -16.84±0.26                                                                  | -16.89±0.26                                                                  |
| Toluene         | -23.42±0.27                                                                  | -23.55±0.22                                                                  | -23.56±0.12                                                                  | -23.53±0.15                                                                  |
| MIBK            | -26.17±0.31                                                                  | -26.29±0.15                                                                  | -26.43±0.20                                                                  | -26.34±0.13                                                                  |
| CPME            | -30.71±0.26                                                                  | -30.53±0.15                                                                  | -30.46±0.25                                                                  | -30.54±0.15                                                                  |
| 2-<br>MTHF      | -30.48±0.20                                                                  | -30.39±0.27                                                                  | -30.73±0.19                                                                  | -30.62±0.12                                                                  |
| 2-<br>Butanol   | -33.93±0.43                                                                  | -34.56±0.59                                                                  | -34.39±0.36                                                                  | -34.09±0.44                                                                  |
| DCM             | -37.93±0.22                                                                  | -37.62±0.24                                                                  | -37.44±0.17                                                                  | -37.39±0.18                                                                  |

83

84

85

86

87

88

89

90

91

92

93

94

95

96 **Table S4.** The solvation free energy of furfural in various solvents

| <b>Systems</b>               | <b>Total <math>\Delta G_{\text{sol}}</math><br/>(kJ/mol)<sup>b</sup></b> | <b>Polar <math>\Delta G_{\text{sol}}</math><br/>(kJ/mol)<sup>b</sup></b> | <b>Nonpolar <math>\Delta G_{\text{sol}}</math><br/>(kJ/mol)<sup>b</sup></b> |
|------------------------------|--------------------------------------------------------------------------|--------------------------------------------------------------------------|-----------------------------------------------------------------------------|
| FF <sup>a</sup> in water     | -16.89±0.26                                                              | -24.14±0.07                                                              | 7.25±0.20                                                                   |
| FF <sup>a</sup> in toluene   | -23.53±0.15                                                              | -11.38±0.08                                                              | -12.15±0.18                                                                 |
| FF <sup>a</sup> in MIBK      | -26.34±0.13                                                              | -13.19±0.08                                                              | -13.16±0.14                                                                 |
| FF <sup>a</sup> in CPME      | -30.54±0.15                                                              | -11.64±0.07                                                              | -18.90±0.12                                                                 |
| FF <sup>a</sup> in 2-MTHF    | -30.62±0.12                                                              | -10.13±0.04                                                              | -20.49±0.10                                                                 |
| FF <sup>a</sup> in 2-butanol | -34.09±0.44                                                              | -15.57±0.20                                                              | -18.52±0.26                                                                 |
| FF <sup>a</sup> in DCM       | -37.39±0.18                                                              | -18.74±0.14                                                              | -18.65±0.06                                                                 |

97 <sup>a</sup>FF: Furfural. <sup>b</sup> $\Delta G_{\text{sol}}$ : Solvation free energy.

98

99

100

101

102

103

104

105

106

107

108

109

110

111

112 **Table S5.**  $\lambda$  Schedule\*

| Window index            | 1 | 2    | 3    | 4    | 5   | 6   | 7   | 8   | 9   | 10  | 11  | 12  | 13  | 14 |
|-------------------------|---|------|------|------|-----|-----|-----|-----|-----|-----|-----|-----|-----|----|
| $\lambda_{\text{vdw}}$  | 0 | 0    | 0    | 0    | 0.1 | 0.2 | 0.3 | 0.4 | 0.5 | 0.6 | 0.7 | 0.8 | 0.9 | 1  |
| $\lambda_{\text{coul}}$ | 0 | 0.25 | 0.50 | 0.75 | 1   | 1   | 1   | 1   | 1   | 1   | 1   | 1   | 1   | 1  |

113 \*The  $\lambda_{\text{vdw}}$  and  $\lambda_{\text{coul}}$  refer to the scaling the van der Waals and Coulombic interactions,  
 114 respectively, at each window.

115

116

117

118

119

120

121

122



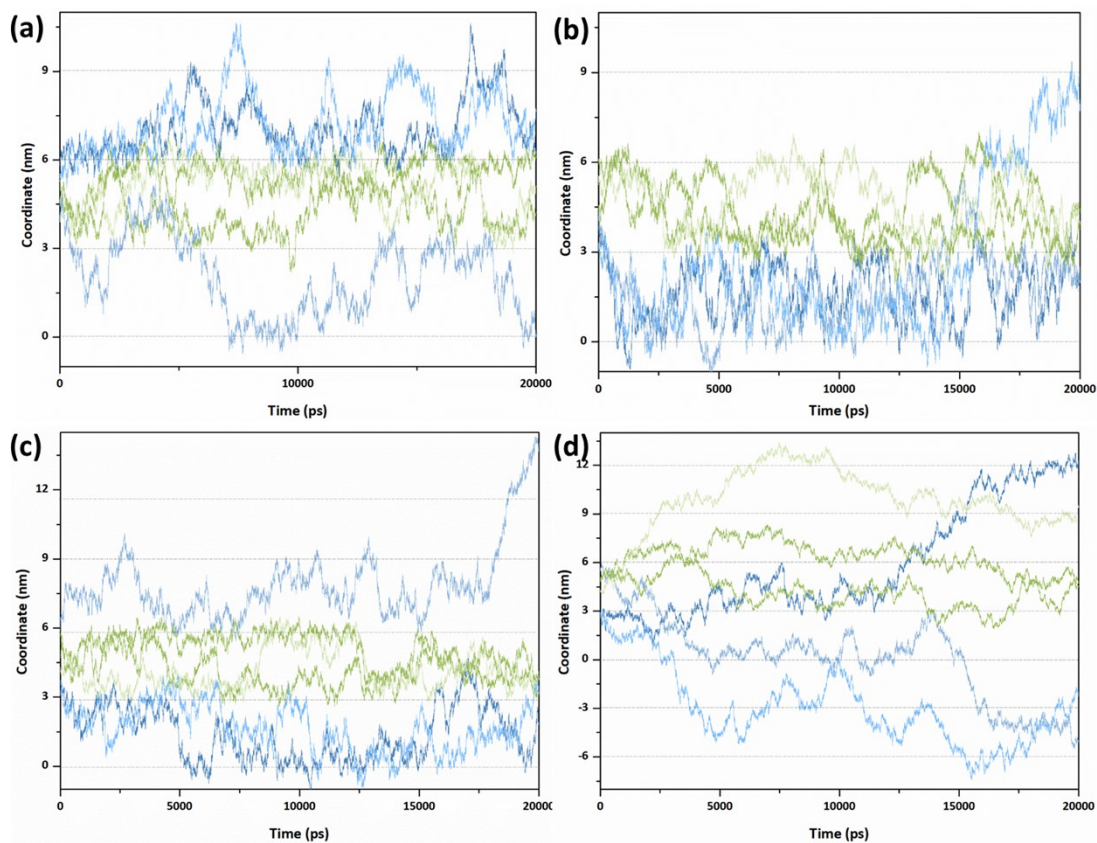

123

124 **Figure S1.** The moving trajectories of furfural and xylose in Z-axis in (a) MIBK/H<sub>2</sub>O,  
 125 (b) 2-MTHF/H<sub>2</sub>O, (c) CPME/H<sub>2</sub>O, and (d) 2-butanol/H<sub>2</sub>O systems. Dotted lines show  
 126 the boundary between the aqueous and organic phases. Initially, the organic phase is in  
 127 the range of 0-3 nm, and the aqueous phase is in the range of 3-6 nm on the Z axis. The  
 128 two phases cycle alternately. Blue: furfural; Green: xylose.

129

130

131

132

133

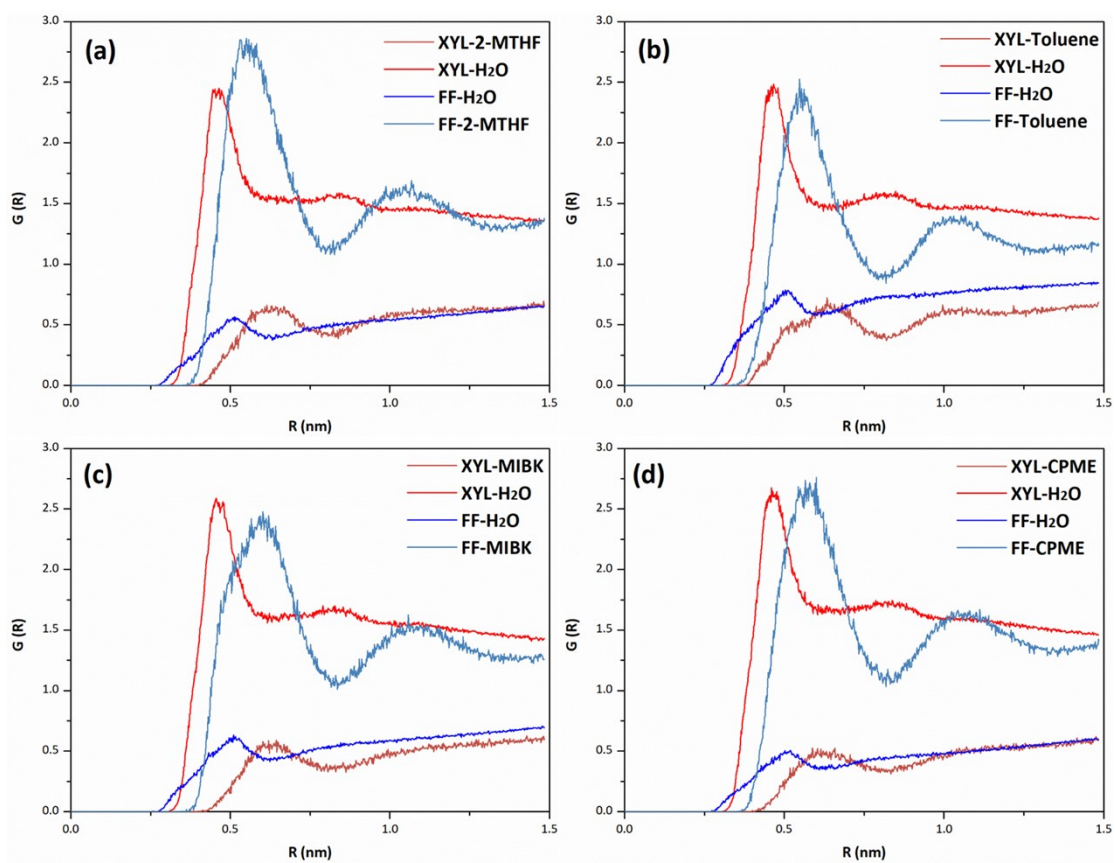

134

135 **Figure S2.** Centre of mass radial distribution functions (RDF) of solvent molecules

136 with respect to xylose or furfural

137

138

139

140

141

142

143

144

145

146

147 **References**

- 148 1. B. Hess, C. Kutzner, D. van der Spoel and E. Lindahl, *Journal of Chemical Theory*  
149 *and Computation*, 2008, **4**, 435-447.
- 150 2. H. J. C. Berendsen, D. van der Spoel and R. van Drunen, *Computer Physics*  
151 *Communications*, 1995, **91**, 43-56.
- 152 3. D. Van Der Spoel, E. Lindahl, B. Hess, G. Groenhof, A. E. Mark and H. J. C.  
153 Berendsen, *Journal of Computational Chemistry*, 2005, **26**, 1701-1718.
- 154 4. W. L. Jorgensen and J. Tirado-Rives, *Proceedings of the National Academy of*  
155 *Sciences of the United States of America*, 2005, **102**, 6665-6670.
- 156 5. L. S. Dodda, J. Z. Vilseck, J. Tirado-Rives and W. L. Jorgensen, *The Journal of*  
157 *Physical Chemistry B*, 2017, **121**, 3864-3870.
- 158 6. L. S. Dodda, I. Cabeza de Vaca, J. Tirado-Rives and W. L. Jorgensen, *Nucleic acids*  
159 *research*, 2017, **45**, W331-W336.
- 160 7. M. J. Robertson, J. Tirado-Rives and W. L. Jorgensen, *Journal of Chemical Theory*  
161 *and Computation*, 2015, **11**, 3499-3509.
- 162 8. W. L. Jorgensen and J. D. Madura, *Molecular Physics*, 1985, **56**, 1381-1392.
- 163 9. G. Bussi, D. Donadio and M. Parrinello, *The Journal of Chemical Physics*, 2007,  
164 **126**, 014101.
- 165 10. M. R. Shirts, J. W. Pitner, W. C. Swope and V. S. Pande, *The Journal of Chemical*  
166 *Physics*, 2003, **119**, 5740-5761.
- 167 11. T. Darden, D. York and L. Pedersen, *The Journal of Chemical Physics*, 1993, **98**,  
168 10089-10092.

- 169 12. B. Hess, H. Bekker, H. J. C. Berendsen and J. G. E. M. Fraaije, *Journal of*  
170 *Computational Chemistry*, 1997, **18**, 1463-1472.
- 171 13. S. Miyamoto and P. A. Kollman, *Journal of Computational Chemistry*, 1992, **13**,  
172 952-962.
- 173 14. W. Humphrey, A. Dalke and K. Schulten, *Journal of Molecular Graphics*, 1996,  
174 **14**, 33-38.
- 175 15. H. Chen, L. Li, T. Zhang, Z. Qiao, J. Tang and J. Zhou, *The Journal of Physical*  
176 *Chemistry C*, 2018, **122**, 2070-2080.
- 177 16. L. Li, C. J. Fennell and K. A. Dill, *The Journal of Physical Chemistry B*, 2014,  
178 **118**, 6431-6437.
- 179
